# Supplementary material
Source: publisher figshare collection journal article supplement (https://rs.figshare.com/ndownloader/files/12590345)
Supplement: Supplementary file 1 [file 12590345]

**Table S2.** Result of linear mixed model analyses (fixed effects) for the survival of both facilitator and beneficiary species in each study group (potato moth, aquatic detritivores and carrion beetles. *** P<0.001. t-tests use Satterthwaite approximations to degrees of freedom.

|  | Estimate | SE | t-value | P-value |
| --- | --- | --- | --- | --- |
| Tuber moth - facilitator |  |  |  |  |
| Intercept | 0.9174 | 0.0222 | 41.20 | < 2e-16*** |
| Stress | -0.0003 | 0.0003 | -1.018 | 0.3116 |
| sp_treatment | 0.0491 | 0.0314 | 1.564 | 0.1214 |
| Stress*sp_treatment | -0.001 | 0.0005 | -3.532 | 0.0006*** |
| Tuber moth - beneficiary |  |  |  |  |
| Intercept | 0.9787 | 0.0359 | 27.244 | < 2e-16*** |
| Stress | -0.0061 | 0.0005 | -10.740 | < 2e-16*** |
| sp_treatment | -0.0337 | 0.0508 | -0.664 | 0.508 |
| Stress*sp_treatment | 0.0039 | 0.0008 | 4.909 | 3.75e-06*** |
| Aquatic detritivore - facilitator |  |  |  |  |
| Intercept | 0.9047 | 0.0228 | 39.523 | <2e-16*** |
| Stress | -0.0001 | 0.0003 | -0.456 | 0.650 |
| sp_treatment | -0.0071 | 0.0323 | -0.220 | 0.826 |
| Stress*sp_treatment | 0.0002 | 0.0005 | 0.411 | 0.682 |
| Aquatic detritivore - beneficiary |  |  |  |  |
| Intercept | 0.9326 | 0.0317 | 29.394 | <2e-16*** |
| Stress | -0.0018 | 0.0046 | -3.958 | 0.0001*** |
| sp_treatment | -0.1868 | 0.0447 | -4.179 | 6.94e-05*** |
| Stress*sp_treatment | 0.0023 | 0.0006 | 3.501 | 0.0007*** |
| Carrion beetle - facilitator |  |  |  |  |
| Intercept | 0.8772 | 0.0676 | 12.975 | 1.18e-12*** |
| Stress | -0.0009 | 0.0009 | -1.026 | 0.313 |
| sp_treatment | 0.0308 | 0.0854 | 0.362 | 0.720 |
| Stress*sp_treatment | -0.0004 | 0.0013 | -0.313 | 0.756 |
| Carrion beetle - beneficiary |  |  |  |  |
| Intercept | 0.8514 | 0.0687 | 12.387 | 4.96e-12*** |
| Stress | -0.0012 | 0.0010 | -1.324 | 0.195 |
| sp_treatment | 0.0696 | 0.0862 | 0.808 | 0.425 |
| Stress*sp_treatment | 0.009 | 0.0014 | 0.646 | 0.523 |
